---

# MEGA: MACHINE LEARNING-ENHANCED GRAPH ANALYTICS FOR COVID-19 INFODEMIC CONTROL

---

**Ching Nam Hang**  
City University of Hong Kong

**Pei-Duo Yu**  
Chung Yuan Christian University

**Lin Ling**  
City University of Hong Kong

**Chee Wei Tan**  
City University of Hong Kong

The authors have withdrawn their manuscript whilst they perform additional experiments to test some of their conclusions further. Therefore, the authors do not wish this work to be cited as reference for the project. If you have any questions, please contact the corresponding author.

Corresponding Author: Ching Nam Hang  
Email: [cnhang3-c@my.cityu.edu.hk](mailto:cnhang3-c@my.cityu.edu.hk)
